# Supplementary material for: KDM6B interacts with TFDP1 to activate P53 signaling in regulating mouse palatogenesis
Source: eLife. 2022 Feb 25;11:e74595. doi: 10.7554/eLife.74595 (PMC9007587; doi:10.7554/eLife.74595)
Supplement: Figure 2—figure supplement 1—source data 1. [file elife-74595-fig2-figsupp1-data1.xlsx]

## Sheet: Figure supplement 6-source data
Control	Wnt1-Cre;Kdm6bfl/fl
17.5	30.7692
10.0257	33.9888
12.2172	28.7815
