# Supplementary material for: KDM6B interacts with TFDP1 to activate P53 signaling in regulating mouse palatogenesis
Source: eLife. 2022 Feb 25;11:e74595. doi: 10.7554/eLife.74595 (PMC9007587; doi:10.7554/eLife.74595)
Supplement: Figure 2—figure supplement 1—source data 2. [file elife-74595-fig2-figsupp1-data2.xlsx]

## Sheet: Sheet1
Control	Wnt1-Cre;Kdm6bfl/fl
11.1111	33.3333
16.6667	26.4706
13.3333	25.5319
0.00039355
