# Supplementary material for: KDM6B interacts with TFDP1 to activate P53 signaling in regulating mouse palatogenesis
Source: eLife. 2022 Feb 25;11:e74595. doi: 10.7554/eLife.74595 (PMC9007587; doi:10.7554/eLife.74595)
Supplement: Figure 2—source data 1. [file elife-74595-fig2-data1.xlsx]

## Sheet: Figure 2-source data 1 for figu
Control	Wnt1-Cre;Kdm6bfl/fl
33.8694	58.2917
35.2941	55.8678
34.0843	51.3758
0.0071886
