# Supplementary material for: KDM6B interacts with TFDP1 to activate P53 signaling in regulating mouse palatogenesis
Source: eLife. 2022 Feb 25;11:e74595. doi: 10.7554/eLife.74595 (PMC9007587; doi:10.7554/eLife.74595)
Supplement: Figure 2—source data 2. [file elife-74595-fig2-data2.xlsx]

## Sheet: Figure 2-source data 2 for figu
Control	Wnt1-Cre;Kdm6bfl/fl
1.55763	3.8961
2.82885	5.56901
2.09618	4.4316
0.018562
