# Supplementary material for: KDM6B interacts with TFDP1 to activate P53 signaling in regulating mouse palatogenesis
Source: eLife. 2022 Feb 25;11:e74595. doi: 10.7554/eLife.74595 (PMC9007587; doi:10.7554/eLife.74595)
Supplement: Figure 2—source data 3. [file elife-74595-fig2-data3.xlsx]

## Sheet: Figure 2-source data 3 for figu
	Control			Wnt1-Cre;Kdm6bfl/fl
E13.5	13.8158	11.5226	9.84849	3.25444	2.32558	2.83912		0.0126819
E14.5	20.3008	18.7166	19.5918	9.44056	6.45161	6.60377		0.00193061
