# Supplementary material for: KDM6B interacts with TFDP1 to activate P53 signaling in regulating mouse palatogenesis
Source: eLife. 2022 Feb 25;11:e74595. doi: 10.7554/eLife.74595 (PMC9007587; doi:10.7554/eLife.74595)
Supplement: Figure 2—source data 4. [file elife-74595-fig2-data4.xlsx]

## Sheet: Figure 2-source data 4 for figu
	Control			Wnt1-Cre;Kdm6bfl/fl
E14.5	9.23077	8.47458	10.5505	2.85714	1.94175	2.88714		0.0021513
E15.5	17.4026	15.1862	18.5841	5.97015	4.72727	7.39437		0.0012306
