# Supplementary material for: KDM6B interacts with TFDP1 to activate P53 signaling in regulating mouse palatogenesis
Source: eLife. 2022 Feb 25;11:e74595. doi: 10.7554/eLife.74595 (PMC9007587; doi:10.7554/eLife.74595)
Supplement: Figure 2—source data 5. [file elife-74595-fig2-data5.xlsx]

## Sheet: Figure 2-source data 5 for figu
Control	Wnt1-Cre;Kdm6bfl/fl
1.59591	1.18414
1.46292	1.17135
1.64194	1.16624
0.0173675
