# Supplementary material for: KDM6B interacts with TFDP1 to activate P53 signaling in regulating mouse palatogenesis
Source: eLife. 2022 Feb 25;11:e74595. doi: 10.7554/eLife.74595 (PMC9007587; doi:10.7554/eLife.74595)
Supplement: Figure 3—source data 2. [file elife-74595-fig3-data2.xlsx]

## Sheet: Figure 3-source data 2 for figu
Control	Wnt1-Cre;Kdm6bfl/fl
19.2766	33.6602
13.0339	32.3909
14.3854	26.7324
0.0059592
