# Supplementary material for: KDM6B interacts with TFDP1 to activate P53 signaling in regulating mouse palatogenesis
Source: eLife. 2022 Feb 25;11:e74595. doi: 10.7554/eLife.74595 (PMC9007587; doi:10.7554/eLife.74595)
Supplement: Figure 4—figure supplement 1—source data 2. [file elife-74595-fig4-figsupp1-data2.xlsx]

## Sheet: Figure supplement 5-source data
Mock	p53 siRNA
0.738647	0.448346
1.02295	0.330867
1.32345	0.476457
