# Supplementary material for: KDM6B interacts with TFDP1 to activate P53 signaling in regulating mouse palatogenesis
Source: eLife. 2022 Feb 25;11:e74595. doi: 10.7554/eLife.74595 (PMC9007587; doi:10.7554/eLife.74595)
Supplement: Figure 4—figure supplement 1—source data 5. [file elife-74595-fig4-figsupp1-data5.xlsx]

## Sheet: Figure supplement 5-source data
Control	Wnt1-Cre;Kdm6bfl/fl
0.509509	0.353364
0.704372	0.454385
0.685409	0.408403
p53 WB quantification ctl vs mut with DMSO

## Sheet: Sheet1
Control	Wnt1-Cre;Kdm6bfl/fl
0.641895	1.06494
1.18188	1.19335
0.662319	0.862313
p53 WB quantification ctl vs mut with nutlin3
