# Supplementary material for: KDM6B interacts with TFDP1 to activate P53 signaling in regulating mouse palatogenesis
Source: eLife. 2022 Feb 25;11:e74595. doi: 10.7554/eLife.74595 (PMC9007587; doi:10.7554/eLife.74595)
Supplement: Figure 4—source data 1. [file elife-74595-fig4-data1.xlsx]

## Sheet: Figure 4-source data 1 for figu
Mock	siRNA
14.9057	68.3373
11.6608	69.3702
36.2468	45.3322
0.0219227
