# Supplementary material for: KDM6B interacts with TFDP1 to activate P53 signaling in regulating mouse palatogenesis
Source: eLife. 2022 Feb 25;11:e74595. doi: 10.7554/eLife.74595 (PMC9007587; doi:10.7554/eLife.74595)
Supplement: Figure 4—source data 2. [file elife-74595-fig4-data2.xlsx]

## Sheet: Figure 4-source data 2 for figu
Mock	p53 siRNA
9.48905	44.5988
11.5578	31.6901
13.082	34.7692
0.0169425
