# Supplementary material for: KDM6B interacts with TFDP1 to activate P53 signaling in regulating mouse palatogenesis
Source: eLife. 2022 Feb 25;11:e74595. doi: 10.7554/eLife.74595 (PMC9007587; doi:10.7554/eLife.74595)
Supplement: Figure 7—source data 1. [file elife-74595-fig7-data1.xlsx]

## Sheet: Figure 7-source data 1 for figu
Control	Wnt1Cre;Kdm6bfl/fl	Wnt1Cre;Kdm6bfl/fl;Ezh2fl/+
33.4476	52.5074	35.5914
41.5261	48.2518	34.122
44.9107	52.196	41.3992
