# Supplementary material for: KDM6B interacts with TFDP1 to activate P53 signaling in regulating mouse palatogenesis
Source: eLife. 2022 Feb 25;11:e74595. doi: 10.7554/eLife.74595 (PMC9007587; doi:10.7554/eLife.74595)
Supplement: Figure 7—source data 2. [file elife-74595-fig7-data2.xlsx]

## Sheet: Figure 7-source data 2 for figu
Control	Wnt1-Cre;Kdm6bfl/fl	Wnt1-Cre;Kdm6bfl/fl;Ezh2fl/+
10.3865	2.19907	9.85402
8.69565	1.6129	8.65633
9.34066	2.57353	9.5537
