# Supplementary material for: KDM6B interacts with TFDP1 to activate P53 signaling in regulating mouse palatogenesis
Source: eLife. 2022 Feb 25;11:e74595. doi: 10.7554/eLife.74595 (PMC9007587; doi:10.7554/eLife.74595)
Supplement: Figure 8—figure supplement 1—source data 1. [file elife-74595-fig8-figsupp1-data1.xlsx]

## Sheet: Figure supplement 6-source data
pCMV6	pKdm6b
0.988533	1.76511
1.31031	2.24389
0.772029	2.30587
