# Supplementary material for: KDM6B interacts with TFDP1 to activate P53 signaling in regulating mouse palatogenesis
Source: eLife. 2022 Feb 25;11:e74595. doi: 10.7554/eLife.74595 (PMC9007587; doi:10.7554/eLife.74595)
Supplement: Figure 8—figure supplement 1—source data 3. [file elife-74595-fig8-figsupp1-data3.xlsx]

## Sheet: Figure supplement 6-source data
Mock	Tfdp1siRNA
1.12693	0.526382
1.1505	0.486452
0.771288	0.480856
