# Supplementary material for: KDM6B interacts with TFDP1 to activate P53 signaling in regulating mouse palatogenesis
Source: eLife. 2022 Feb 25;11:e74595. doi: 10.7554/eLife.74595 (PMC9007587; doi:10.7554/eLife.74595)
Supplement: Figure 8—figure supplement 1—source data 4. [file elife-74595-fig8-figsupp1-data4.xlsx]

## Sheet: Figure supplement 6-source data
pCMV6	pTfdp1
1.04087	3.57507
1.00956	3.73147
0.951637	3.02901
