# Supplementary material for: KDM6B interacts with TFDP1 to activate P53 signaling in regulating mouse palatogenesis
Source: eLife. 2022 Feb 25;11:e74595. doi: 10.7554/eLife.74595 (PMC9007587; doi:10.7554/eLife.74595)
Supplement: Figure 8—figure supplement 1—source data 5. [file elife-74595-fig8-figsupp1-data5.xlsx]

## Sheet: Figure supplement 6-source data
pCMV6	pTfdp1
0.816645	3.00065
0.990645	2.57896
1.23609	2.456
