# Supplementary material for: KDM6B interacts with TFDP1 to activate P53 signaling in regulating mouse palatogenesis
Source: eLife. 2022 Feb 25;11:e74595. doi: 10.7554/eLife.74595 (PMC9007587; doi:10.7554/eLife.74595)
Supplement: Figure 8—source data 2. [file elife-74595-fig8-data2.xlsx]

## Sheet: Figure 8-source data 2 for figu
Control	Wnt1-Cre;Kdm6bfl/fl	Wnt1-Cre;Kdm6bfl/fl;Ezh2fl/+
0.970525	0.754199	0.906856
0.981652	0.827373	0.959057
1.04963	0.808765	0.934341
