# Supplementary material for: KDM6B interacts with TFDP1 to activate P53 signaling in regulating mouse palatogenesis
Source: eLife. 2022 Feb 25;11:e74595. doi: 10.7554/eLife.74595 (PMC9007587; doi:10.7554/eLife.74595)
Supplement: Figure 8—source data 3. [file elife-74595-fig8-data3.xlsx]

## Sheet: Figure 8-source data 3 for figu
IgG	KDM6B
1.00774	1.58571
0.969079	1.68018
1.02318	1.68908
