# Supplementary material for: KDM6B interacts with TFDP1 to activate P53 signaling in regulating mouse palatogenesis
Source: eLife. 2022 Feb 25;11:e74595. doi: 10.7554/eLife.74595 (PMC9007587; doi:10.7554/eLife.74595)
Supplement: Figure 8—source data 5. [file elife-74595-fig8-data5.xlsx]

## Sheet: Figure 8-source data 5 for figu
Pcmv6	pKdm6a
1.0563	1.04479
1.05784	1.1138
0.89494	1.01994
