# Supplementary material for: KDM6B interacts with TFDP1 to activate P53 signaling in regulating mouse palatogenesis
Source: eLife. 2022 Feb 25;11:e74595. doi: 10.7554/eLife.74595 (PMC9007587; doi:10.7554/eLife.74595)
Supplement: Figure 8—source data 6. [file elife-74595-fig8-data6.xlsx]

## Sheet: Figure 8-source data 6 for figu
	Control			Wnt1-Cre;Kdm6bfl/fl
Gapdh Promoter	1.01351	1.00007	0.986415	1.00023	0.891347	1.10842
p53 Promoter	2.27137	2.08767	2.53683	1.44504	1.58916	1.77344
