# Supplementary material for: KDM6B interacts with TFDP1 to activate P53 signaling in regulating mouse palatogenesis
Source: eLife. 2022 Feb 25;11:e74595. doi: 10.7554/eLife.74595 (PMC9007587; doi:10.7554/eLife.74595)
Supplement: Figure 8—source data 7. [file elife-74595-fig8-data7.xlsx]

## Sheet: Figure 8-source data 7 for figu
Control	Wnt1-Cre;Kdm6bfl/fl
1.00018	0.701784
1.00336	0.8853
1.0005	1.06677
