# Supplementary material for: KDM6B interacts with TFDP1 to activate P53 signaling in regulating mouse palatogenesis
Source: eLife. 2022 Feb 25;11:e74595. doi: 10.7554/eLife.74595 (PMC9007587; doi:10.7554/eLife.74595)
Supplement: Figure 8—source data 8. [file elife-74595-fig8-data8.xlsx]

## Sheet: Figure 8-source data 8 for figu
Mock	Tfdp1 siRNA
0.882856	0.654839
0.946931	0.656293
1.19617	0.60765
