# Supplementary material for: KDM6B interacts with TFDP1 to activate P53 signaling in regulating mouse palatogenesis
Source: eLife. 2022 Feb 25;11:e74595. doi: 10.7554/eLife.74595 (PMC9007587; doi:10.7554/eLife.74595)
Supplement: Figure 8—source data 9. [file elife-74595-fig8-data9.xlsx]

## Sheet: Figure 8-source data 9 for figu
Pcmv6	pTfdp1
0.985732	1.60079
1.04419	1.57845
0.971545	1.46632
