# Supplementary material for: KDM6B interacts with TFDP1 to activate P53 signaling in regulating mouse palatogenesis
Source: eLife. 2022 Feb 25;11:e74595. doi: 10.7554/eLife.74595 (PMC9007587; doi:10.7554/eLife.74595)
Supplement: Figure 8—source data 10. [file elife-74595-fig8-data10.xlsx]

## Sheet: Figure 8-source data 10 for fig
Pcmv6	pTfdp1
1.01899	1.16942
1.02138	1.09753
0.960821	1.02558
